# Supplementary material
Source: publisher figshare collection journal article supplement (https://frontiersin.figshare.com/ndownloader/files/13392848)
Supplement: Supplementary file [file 13392848]

## Supplementary figure S2

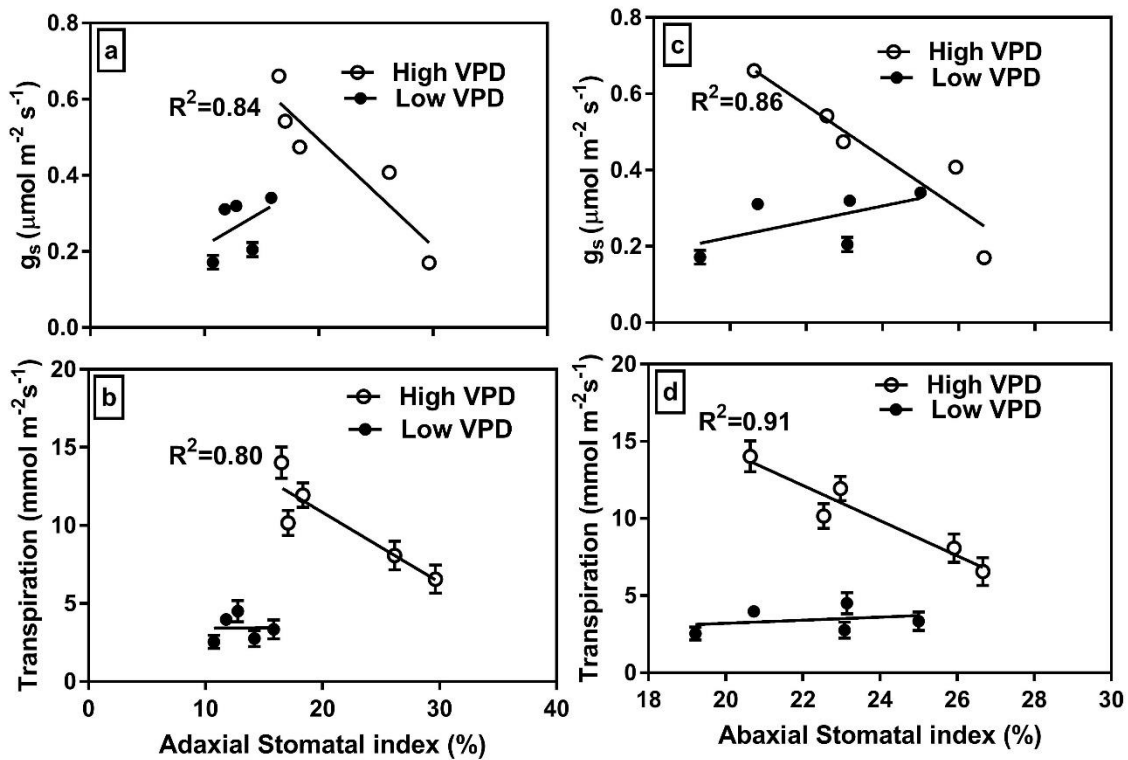

## Supplementary figure S2: Relationship of Adaxial and Abaxial stomatal index with stomatal conductance ( $g_s$ ) and transpiration in five cotton genotypes

a) Stomatal conductance  $g_s$  ( $\mu\text{mol m}^{-2} \text{s}^{-1}$ ) and b) Transpiration ( $\text{mmol m}^{-2} \text{s}^{-1}$ ) panels represents relationship with adaxial stomatal index and c)  $g_s$  ( $\mu\text{mol m}^{-2} \text{s}^{-1}$ ) and d) Transpiration ( $\text{mmol m}^{-2} \text{s}^{-1}$ ) with abaxial stomatal index in five cotton genotypes. The closed circles are the data obtained under low VPD and open circles under high VPD. In all panels the correlation was significant only for high VPD conditions ( $R^2$  from 0.80 to 0.91,  $P < 0.01$ ).
